# Supplementary material
Source: ML conference proceedings conference paper supplement (https://proceedings.mlr.press/v31/li13a.html)
Supplement: Supplementary file 1 [file li13a-supp.pdf]

---

# Dynamic Scaled Sampling for Deterministic Constraints Supplemental Material

---

**Lei Li**

University of California, Berkeley  
leili@cs.berkeley.edu

**Bharath Ramsundar**

Stanford University  
rbharath@stanford.edu

**Stuart Russell**

University of California, Berkeley  
russell@cs.berkeley.edu

## Technical details

**Problem 3** (Posterior with bounded non-negative continuous variables) Let  $s$  be a target sum,  $\epsilon$  be a positive number, and suppose there are  $k$  *independent* real-valued random variables  $X_1, \dots, X_k$ , such that  $X_i \sim p_i(x)$  and the prior probability densities  $p_i(x) > 0$  if and only if  $x \in [0, \infty)$ .  $\epsilon$  is coded in finite bits.  $p_i(\cdot)$  is represented in parametric form with finitely many parameters in constant bits. The goal is to find a sample  $(x_i)$  from the posterior probability density  $p(X_1, \dots, X_k \mid \sum_{i=1}^k X_i = s)$  such that  $\sum_{i=1}^k X_i = s$  and the un-normalized probability density

$$p(X_1 = x_1) \cdot p(X_2 = x_2) \cdots p(X_k = x_k) > \epsilon \quad (1)$$

If such an  $(x_i)$  does not exist, failure must be reported.

**Theorem 2:** Problem 3 is NP-hard.

*Proof.* Suppose that such a subset  $A \subseteq \{a_1, \dots, a_k\}$  does exist. Let  $X_i = x_i = a_i$  if  $a_i \in A$  and  $X_i = x_i = 0$  otherwise. Then by definition of  $p_i(x_i)$ :

$$\begin{aligned} & \prod_{i=1}^k p(X_i = x_i) \\ &= \frac{1}{\prod_i c_i} \cdot \frac{1}{(2\delta\sqrt{2\pi})^k} \prod_i \left( 1 + \exp\left(-\frac{a_i^2}{\delta^2}\right) \right) > \epsilon \end{aligned}$$

By the definition of  $\eta$  and  $\epsilon$ , the above LHS is greater than  $\epsilon$ . As a result, the sample  $(X_1 = x_1 \dots X_k = x_k)$  is a valid solution for Problem .

Conversely, if Problem has a valid solution, we can show there is a subset  $A$  of  $\{a_1, \dots, a_k\}$  summing up to  $s$ . To show this, suppose that a sample  $(X_1 = x_1, \dots, X_k = x_k)$  such that  $\sum_{i=1}^k x_i = s$  and the un-normalized probability density  $\prod_i p(X_i = x_i) > \epsilon$ . We claim  $|x_i| < \frac{1}{2k}$  or  $|x_i - a_i| < \frac{1}{2k}$  for each  $i = 1 \dots k$ .

To see this, note that if  $|x_j| \geq \frac{1}{2k}$  and  $|x_i - a_i| \geq \frac{1}{2k}$ ,

$$\begin{aligned} & \prod_{i=1}^k p(X_i = x_i) \\ &= \frac{1}{\prod_i c_i} \cdot \frac{1}{(2\delta\sqrt{2\pi})^k} \prod_i \left( \exp\left(-\frac{x_i^2}{\delta^2}\right) + \exp\left(-\frac{(a_i - x_i)^2}{\delta^2}\right) \right) \\ &\leq \frac{1}{\prod_i c_i} \cdot \frac{1}{(2\delta\sqrt{2\pi})^k} \prod_i \left( 1 + \exp\left(-\frac{a_i^2}{\delta^2}\right) \right) \\ &\quad \cdot \frac{\exp\left(-\frac{1}{4k^2\delta^2}\right) + \exp\left(-\frac{(a_j - 1/2k)^2}{\delta^2}\right)}{1 + \exp\left(-\frac{a_j^2}{\delta^2}\right)} \\ &< \epsilon \end{aligned}$$

Since

$$\frac{\exp\left(-\frac{1}{4k^2\delta^2}\right) + \exp\left(-\frac{(a_j - 1/2k)^2}{\delta^2}\right)}{1 + \exp\left(-\frac{a_j^2}{\delta^2}\right)} < 2 \exp(-16) = \eta$$

We can select a set  $A = \{a_i \mid |x_i - a_i| < \frac{1}{2k}\}$ . It then follows  $|\sum_a \in A a - \sum_i x_i| < \frac{k}{2k} = \frac{1}{2}$ . Therefore  $\sum_{a \in A} a = s$ .  $\square$

**Lemma 1.**  $\Delta_x^k$  is compact.

**Proof of Lem. 1**

*Proof.*  $\Delta_x^k$  is a closed and bounded subset of  $\mathbb{R}^{k+1}$ .  $\square$

**Lemma 2.** Let  $f$  be a continuous real valued function defined on compact set  $X$ . Then  $f$  is bounded on  $X$ .

**Proof of Lem. 2**

*Proof.*  $f(X)$  is a compact subset of  $\mathbb{R}$  and is hence closed and bounded.  $\square$

**Lemma 3.** The target joint distribution  $X_1, \dots, X_k, \sum_{i=1}^k X_i = S$  has continuous probability density function  $p$  on  $\mathbb{R}^k$  with support containing the standard  $k - 1$  simplex of value  $S$ . That is

$$\text{supp}(X_1, \dots, X_k, \sum_{i=1}^k X_i = S) \supseteq \Delta_S^{k-1}$$

**Proof of Lem. 3**

*Proof.* By Assumption (1) we can write the joint density as

$$N(x_1, \dots, x_k, s) = \left( \prod_{i=1}^n p(x_i) \right) I \left( \sum_{i=1}^k x_i = s \right)$$

This expression is continuous on  $\Delta_S^{k-1}$  when  $s = S$  so we have a continuous density on  $\Delta_S^{k-1}$

□

**Lemma 4.** *If  $S - \sum_{j=1}^{i-1} x_j > 0$  then*

$$P_{q_i(\cdot|\eta_i)}(0 \leq X_i \leq S - \sum_{j=1}^{i-1} x_j) \geq \frac{1}{2}$$

**Proof of Lem. 4**

*Proof.* Note that

$$\mathbb{E}_{q_i(\cdot|\eta_i)}[X_i] = \int x_i q_i(x_i|\eta_i) dx_i = \eta_i = \frac{S - \sum_{j=1}^{i-1} x_j}{k - i + 1}$$

Using this equation, we calculate that

$$\begin{aligned} P_{q_i(\cdot|\eta_i)}(0 \leq X_i \leq S - \sum_{j=1}^{i-1} x_j) &= \int q_i(x_i|\eta_i) I(0 \leq x_i \leq \eta_i(k - i + 1)) dx_i \\ &\geq 1 - \int q_i(x_i|\eta_i) I(x_i > 2\eta_i) \\ &= 1 - P_{q_i(\cdot|\eta_i)}(x_i > 2\eta_i) \\ &\geq 1 - \frac{\mathbb{E}_{q_i(\cdot|\eta_i)}[X_i]}{2\eta_i} = 1 - \frac{\eta_i}{2\eta_i} = \frac{1}{2} \end{aligned}$$

□

**Lemma 5.** *DYSC( $S, k, X_i, q_i$ ) has nonzero probability density function  $q$  on  $\mathbb{R}^k$  with support equal to the standard  $k - 1$  simplex of value  $S$*

$$\text{supp}(\text{DYSC}(S, k, X_i, q_i)) = \Delta_S^{k-1}$$

*$q$  is continuous in the interior of  $\Delta_S^{k-1}$ ,  $\text{int}(\Delta_S^{k-1})$ , and is lower bounded on  $\Delta_S^{k-1}$  by some  $c > 0$ .*

**Proof of Lem. 5**

*Proof.* We prove this result by constructing an explicit formula for  $q$  on  $\mathbb{R}^k$ . Given  $x \in \mathbb{R}^k$ , as before let

$$\ell(x, S) = \min(k - 1, \max_j \sum_{i=1}^{j-1} |x_i| < 1)$$

We need the function  $\ell(x, S)$  since Alg. 1 stops random sampling at  $j$  if  $j = k - 1$  or if  $\sum_{i=1}^j x_i = S$ . Using this function, we can write our formula,

$$q(x_1, \dots, x_k) \propto \left( \prod_{i=1}^{\ell(x, S)} \frac{q_i(x_i|\eta_i) I(0 \leq x_i \leq S - \sum_{j=1}^{i-1} x_j)}{\int q_i(y|\eta_i) I(0 \leq y \leq S - \sum_{j=1}^{i-1} x_j) dy} \right)$$

If  $x \notin \Delta_S^{k-1}$ , the indicator functions in the above formula guarantee that  $q(x) = 0$ . If  $x \in \Delta_S^{k-1}$ , then the above formula simplifies.

$$q(x_1, \dots, x_k) = \frac{N(x_1, \dots, x_k)}{D(x_1, \dots, x_k)}$$

$$N(x) = \prod_{i=1}^{\ell(x, S)} q_i(x_i|\eta_i)$$

$$D(x) = \prod_{i=1}^{\ell(x, S)} \int q_i(y|\eta_i) I(0 \leq y \leq S - \sum_{j=1}^{i-1} x_j) dy$$

where  $N$  and  $D$  are respectively the numerator and denominator. Assumption (3) guarantees that  $N(x)$  and  $D(x)$  are positive for  $x \in \Delta_S^{k-1}$  and continuous in any neighborhood where  $\ell(x, S)$  is constant. Specifically note that  $\ell(x, S)$  is continuous in  $\text{int}(\Delta_S^{k-1})$  so  $N(x)$  and  $D(x)$  are continuous there as well. Before we prove continuity of  $q$  on  $\text{int}(\Delta_S^{k-1})$ , we will need the following consequence of lemma 4

$$\begin{aligned} D(x_1, \dots, x_k) &= \prod_{i=1}^{\ell(x, S)} \int q_i(y|\eta_i) I(0 \leq y \leq S - \sum_{j=1}^{i-1} x_j) dy \\ &= \prod_{i=1}^{\ell(x, S)} P_{q_i(\cdot|\eta_i)}(0 \leq X_i \leq S - \sum_{j=1}^{i-1} x_j) \\ &\geq \prod_{i=1}^{\ell(x, S)} \frac{1}{2} \geq \left( \frac{1}{2} \right)^k \end{aligned}$$

Thus the denominator  $D$  is lower bounded by a positive number. Now let  $x, y \in \text{int}(\Delta_S^{k-1})$ . We can calcu-

late

$$\begin{aligned}
 |q(x) - q(y)| &= \left| \frac{N(x)}{D(x)} - \frac{N(y)}{D(y)} \right| \\
 &= \left| \frac{N(x)}{D(x)} - \frac{N(x)}{D(y)} + \frac{N(x)}{D(y)} - \frac{N(y)}{D(y)} \right| \\
 &= \left| N(x) \left( \frac{1}{D(x)} - \frac{1}{D(y)} \right) + \frac{1}{D(y)} (N(x) - N(y)) \right| \\
 &\leq N(x) \left| \frac{1}{D(x)} - \frac{1}{D(y)} \right| + \frac{1}{D(y)} |N(x) - N(y)| \\
 &\leq \left| \frac{1}{D(x)} - \frac{1}{D(y)} \right| + 2^k |N(x) - N(y)|
 \end{aligned}$$

Since  $\frac{1}{D}$  and  $N$  are both positive continuous functions on  $\text{int}(\Delta_S^{k-1})$ , we can make the right hand side arbitrarily small as  $|x - y| \rightarrow 0$ . It follows that  $q$  is continuous on  $\text{int}(\Delta_S^{k-1})$ . We now show that  $q$  is lower bounded on  $\Delta_S^{k-1}$ . By Assumption (3), there exist continuous positive functions  $f_i$  on  $[0, \infty)$  that lower bound  $q_i$  regardless of choice of  $\eta_i$ . Then  $f = \prod_{i=1}^k f_i$  defines a positive continuous function on  $\Delta_S^{k-1}$ . Since  $\Delta_S^{k-1}$  is compact,  $f$  has a lower bound  $c > 0$  on  $\Delta_S^{k-1}$ . It follows that  $q$  is lower bounded by  $c$ .  $\square$
